# Supplementary material for: Treatment of intra-articular hip malignancy with extra-articular resection, preservation of the acetabular columns, and total hip arthroplasty
Source: PubMed Central journal article supplement — Arthroplast Today. 2018 Sep 7;4(4):431–5. doi: 10.1016/j.artd.2018.07.007 (PMC6287234; doi:10.1016/j.artd.2018.07.007), 2018-09-07
Supplement: mmc1.pdf [file mmc1.pdf]

# CONFLICT OF INTEREST STATEMENT

## *Arthroplasty Today*

(Adopted from the American Academy of Orthopaedic Surgeons disclosure statement)

The following form must be filled out completely and submitted by each author (example, 6 authors, 6 forms). If no disclosure is required, please write/type "none" at the end of each sentence.

**Treatment of Intra-articular hip malignancy with extra-articular resection, preservation of the acetabular columns and total hip arthroplasty: A case report.**

---

Manuscript Title

1. Royalties from a company or supplier (The following conflicts were disclosed)  
Microport
2. Speakers bureau/paid presentations for a company or supplier (The following conflicts were disclosed)  
None
- 3A. Paid employee for a company or supplier (The following conflicts were disclosed)  
None
- 3B. Paid consultant for a company or supplier (The following conflicts were disclosed)  
Zimmer Biomet  
Microport Orthopaedics, Inc
- 3C. Unpaid consultants for a company or supplier (The following conflicts were disclosed)  
None
4. Stock or stock options in a company or supplier (The following conflicts were disclosed)  
None
5. Research support from a company or supplier as a Principal Investigator (The following conflicts were disclosed)  
Zimmer, Inc.
6. Other financial or material support from a company or supplier (The following conflicts were disclosed)  
None
7. Royalties, financial or material support from publishers (The following conflicts were disclosed)  
Wolters Kluwer Health
8. Medical/Orthopaedic publications editorial/governing board (The following conflicts were disclosed)  
None
9. Board member/committee appointments for a society (The following conflicts were disclosed)  
None

**Each author must sign AND print or type his/her name, date and submit a separate form**

In addition, one BLINDED Conflict of Interest form (no author names used) should be submitted per manuscript with all author disclosures.

John Clohisy  
Author Name (Print or Type)

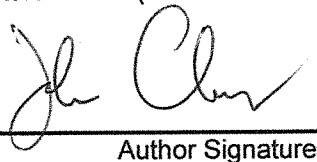  
Author Signature

5-8-18  
Date
