# Supplementary material for: Treatment of intra-articular hip malignancy with extra-articular resection, preservation of the acetabular columns, and total hip arthroplasty
Source: PubMed Central journal article supplement — Arthroplast Today. 2018 Sep 7;4(4):431–5. doi: 10.1016/j.artd.2018.07.007 (PMC6287234; doi:10.1016/j.artd.2018.07.007), 2018-09-07
Supplement: mmc2.pdf [file mmc2.pdf]

# CONFLICT OF INTEREST STATEMENT

## *Arthroplasty Today*

(Adopted from the American Academy of Orthopaedic Surgeons disclosure statement)

The following form must be filled out completely and submitted by each author (example, 6 authors, 6 forms). If no disclosure is required, please write/type "none" at the end of each sentence.

**Treatment of Intra-articular hip malignancy with extra-articular resection, preservation of the acetabular columns and total hip arthroplasty: A case report.**

---

Manuscript Title

1. Royalties from a company or supplier (The following conflicts were disclosed)  
Fate Therapeutics
2. Speakers bureau/paid presentations for a company or supplier (The following conflicts were disclosed)  
None
- 3A. Paid employee for a company or supplier (The following conflicts were disclosed)  
None
- 3B. Paid consultant for a company or supplier (The following conflicts were disclosed)  
None
- 3C. Unpaid consultants for a company or supplier (The following conflicts were disclosed)  
None
4. Stock or stock options in a company or supplier (The following conflicts were disclosed)  
None
5. Research support from a company or supplier as a Principal Investigator (The following conflicts were disclosed)  
None
6. Other financial or material support from a company or supplier (The following conflicts were disclosed)  
None
7. Royalties, financial or material support from publishers (The following conflicts were disclosed)  
None
8. Medical/Orthopaedic publications editorial/governing board (The following conflicts were disclosed)  
Editorial Board of *Bone*
9. Board member/committee appointments for a society (The following conflicts were disclosed)  
President, American Orthopaedic Association

**Each author must sign AND print or type his/her name, date and submit a separate form**

In addition, one BLINDED Conflict of Interest form (no author names used) should be submitted per manuscript with all author disclosures.

Regis J. O'Keefe, MD, PhD

Author Name (Print or Type)

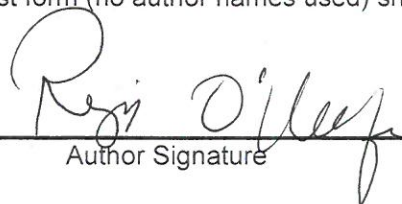

Author Signature

5/8/18

Date
